# Supplementary material
Source: MDPI journal article supplement (https://www.mdpi.com/2073-4441/16/5/649)
Supplement: s1 [file s1]

## **Supplementary Material**

for

### **Electro-Assisted Fe<sup>3+</sup>/Persulfate System for the Degradation of Bezafibrate in Water: Kinetics, Degradation Mechanism, and Toxicity**

Yu-qiong Gao \*, Ke-xuan Li, Xiang-mei Zhong, Han Ning

School of Environment and Architecture, University of Shanghai for Science and  
Technology, Shanghai 200093, China

\*Corresponding author.

Email address: [gaoyq@usst.edu.cn](mailto:gaoyq@usst.edu.cn) (Y.Q. Gao).

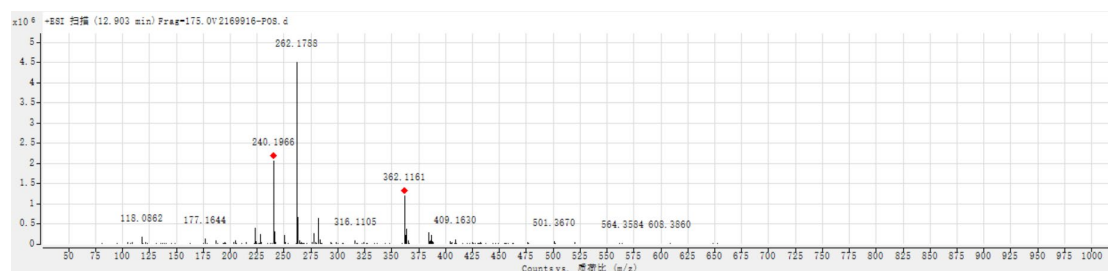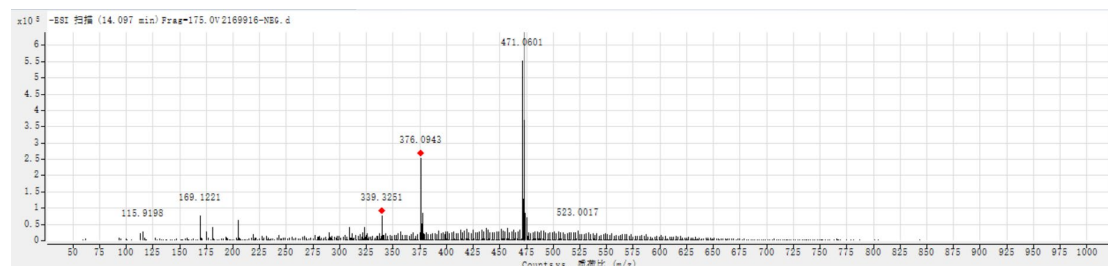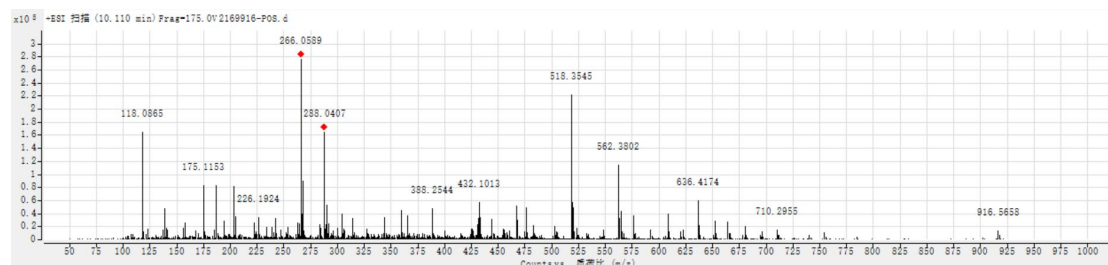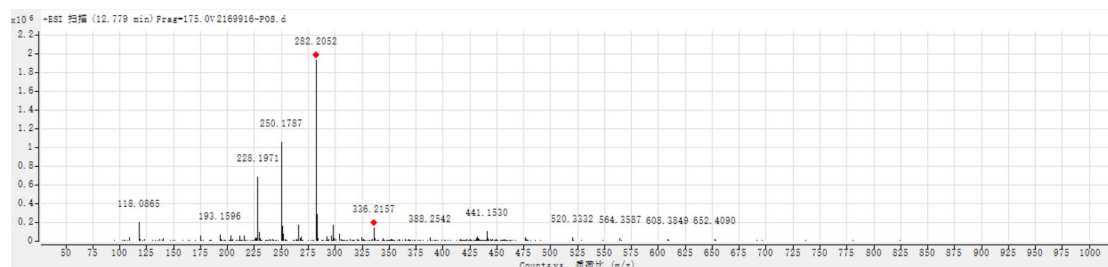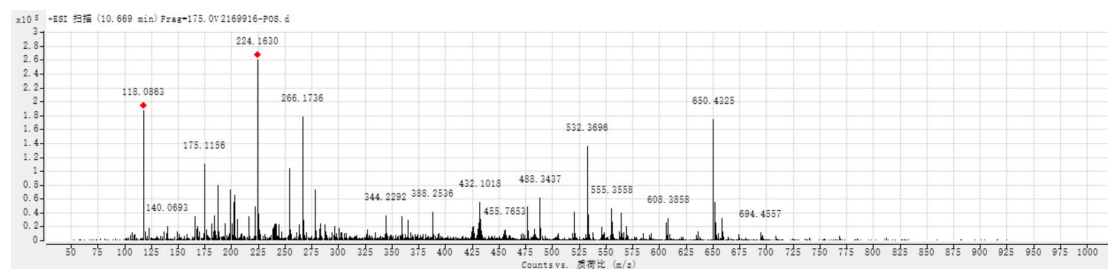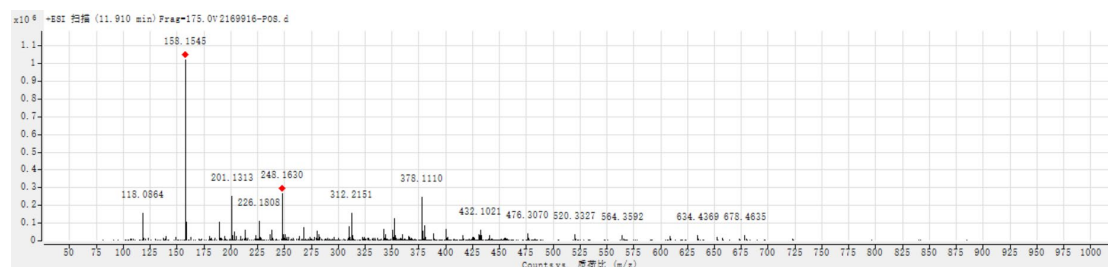

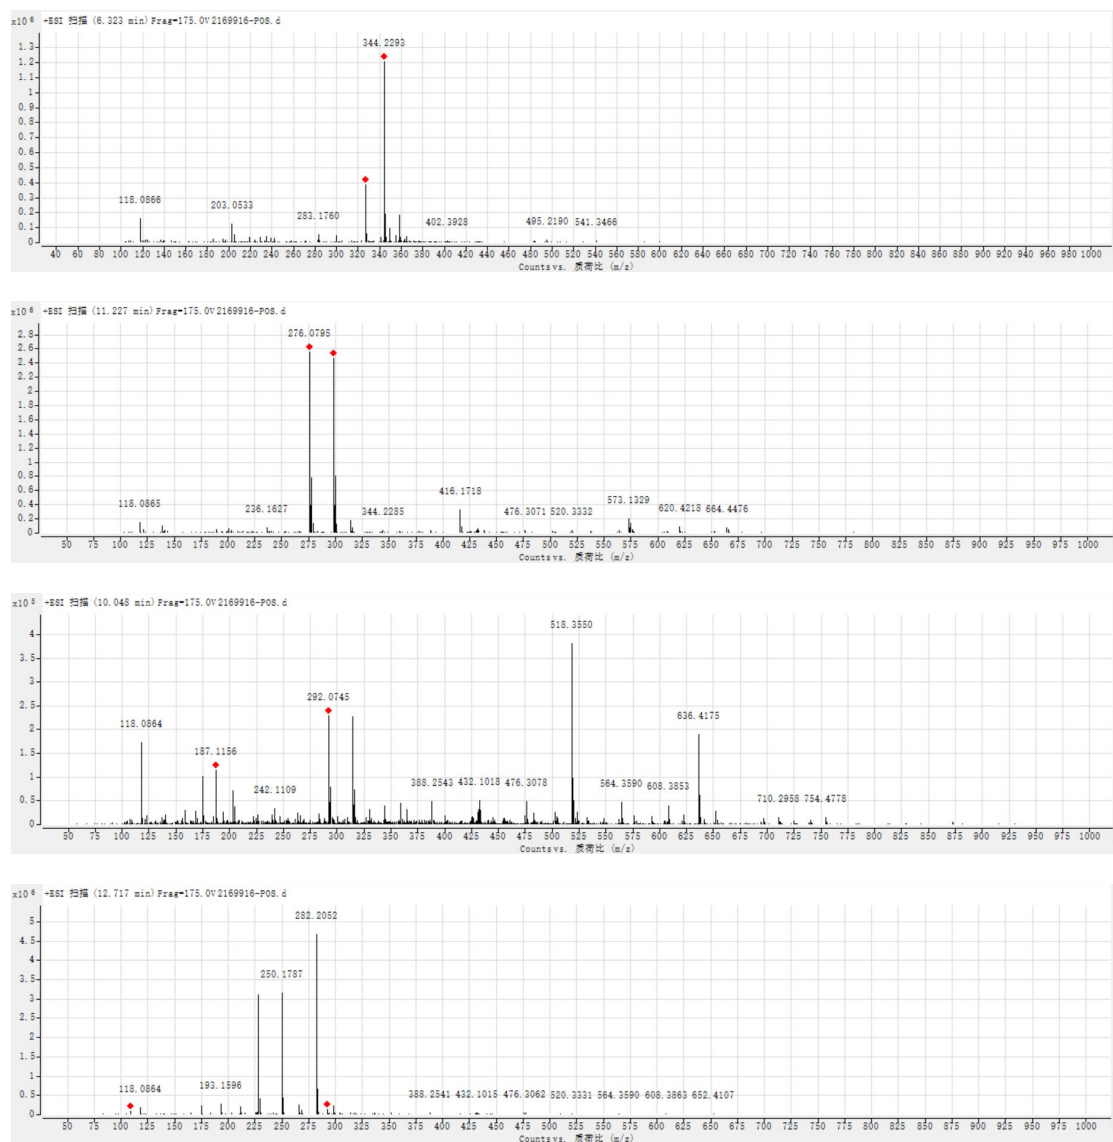

**Figure S1.** The MS<sup>2</sup> spectrum of BZF and its DPs.

**Table S1.** Acute and chronic toxicity of BZF and its degradation products.

| Compounds | Acute Toxicity (mg/L)       |                                |                                       | Chronic Toxicity (ChV)<br>(mg/L) |         |                |
|-----------|-----------------------------|--------------------------------|---------------------------------------|----------------------------------|---------|----------------|
|           | Fish<br>(LC <sub>50</sub> ) | Daphnid<br>(LC <sub>50</sub> ) | Green<br>Algae<br>(EC <sub>50</sub> ) | Fish                             | Daphnid | Green<br>Algae |
| BZF       | 17.6                        | 12.2                           | 4.87                                  | 0.618                            | 4.62    | 8.40           |
| DP1       | 79.3                        | 53.0                           | 77.7                                  | 9.4                              | 8.16    | 29.3           |
| DP2       | 290                         | 163                            | 115                                   | 28.0                             | 15.3    | 29.3           |
| DP3       | 1830                        | 1050                           | 815                                   | 181                              | 105     | 219            |
| DP4       | 108000                      | 8430                           | 16100                                 | 23000                            | 458     | 3940           |
| DP5       | 440                         | 262                            | 238                                   | 45.5                             | 29.2    | 69.3           |
| DP6       | 273                         | 172                            | 197                                   | 30.2                             | 22.4    | 65.2           |
| DP7       | 8.86                        | 5.82                           | 7.88                                  | 1.03                             | 0.848   | 2.85           |
| DP8       | 25.3                        | 15.9                           | 17.9                                  | 2.79                             | 2.05    | 5.87           |
| DP9       | 25.3                        | 15.9                           | 17.9                                  | 2.79                             | 2.05    | 5.87           |
